# Supplementary material for: Caloric restriction alleviates aging-related fibrosis of kidney through downregulation of miR-21 in extracellular vesicles
Source: Aging (Albany NY). 2020 Aug 27;12(18):18052–72. doi: 10.18632/aging.103591 (PMC7585074; doi:10.18632/aging.103591)
Supplement: Supplementary Figures [file aging-12-103591-s001..pdf]

SUPPLEMENTARY FIGURES

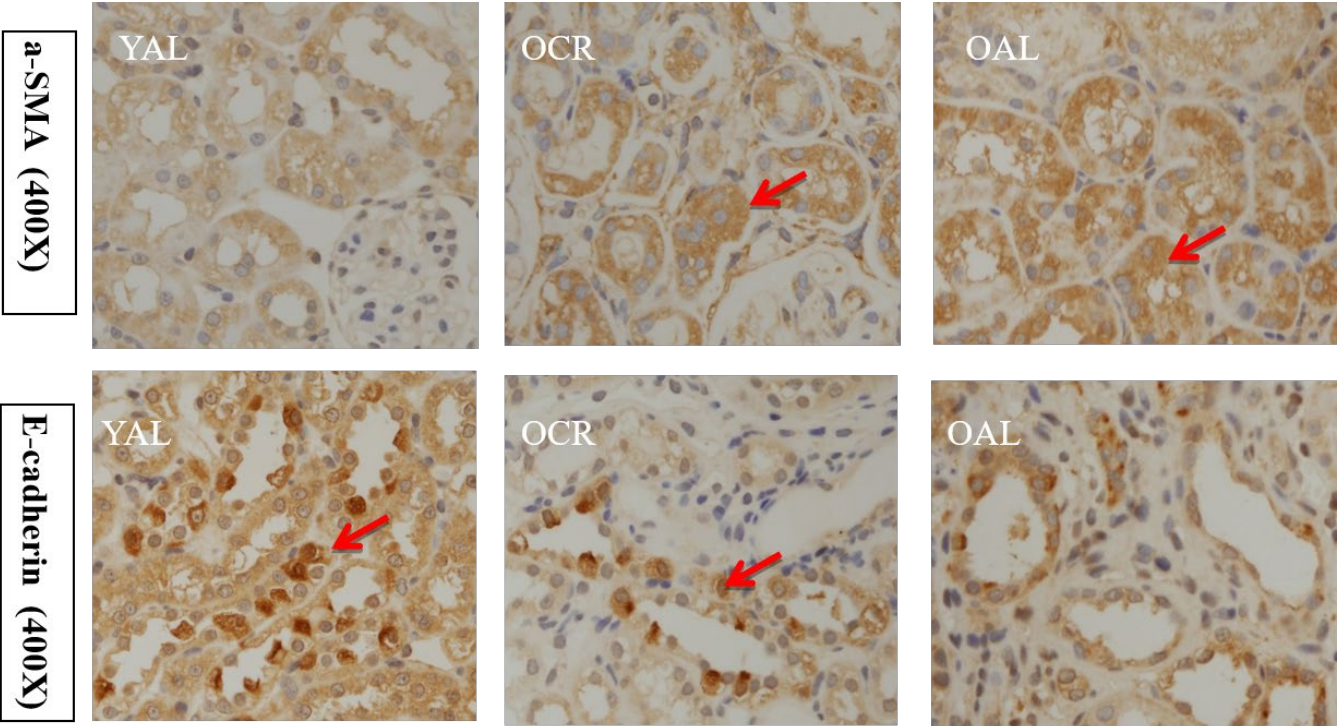

Supplementary Figure 1. Detection of E-cadherin, α-SMA level by immunohistochemistry staining in three groups.

A

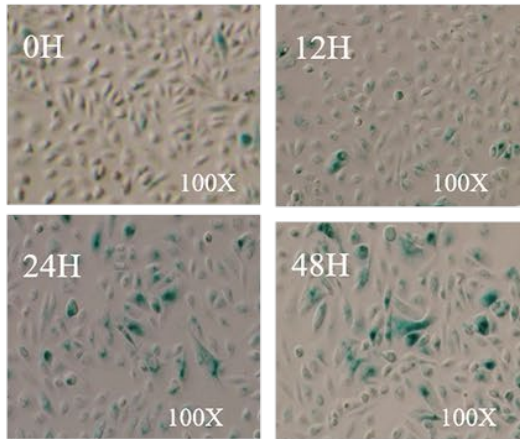

B

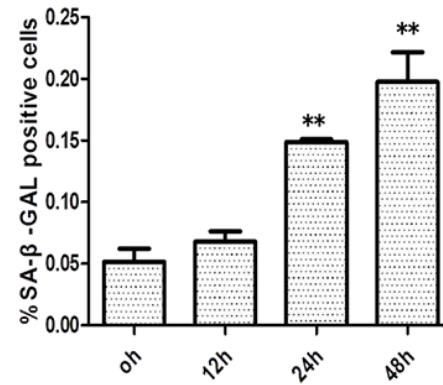

C

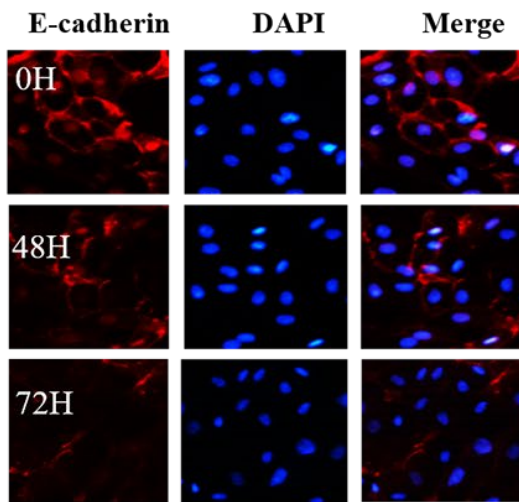

D

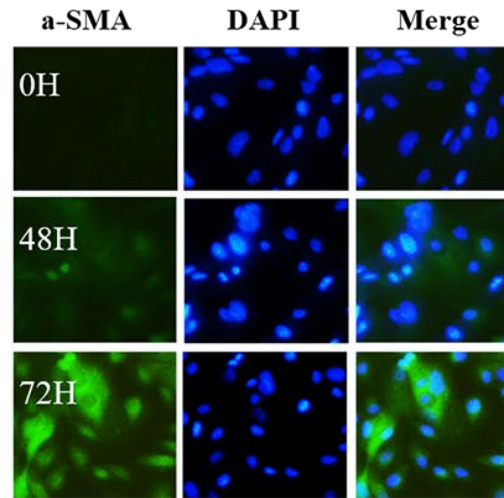

E

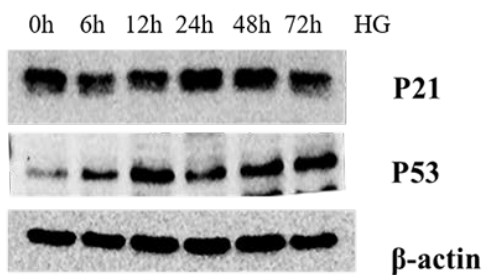

F

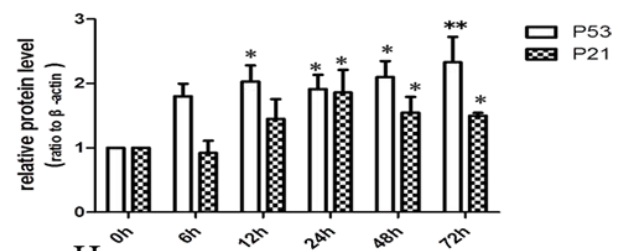

G

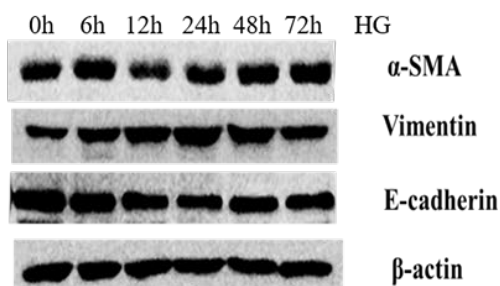

H

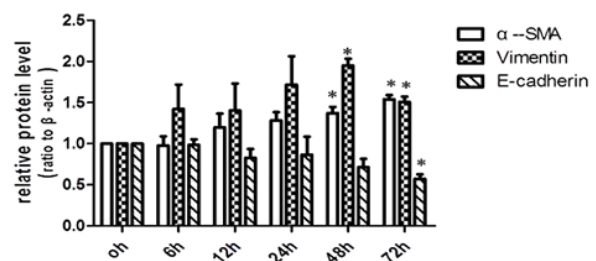

**Supplementary Figure 2. The expression of E-cadherin,  $\alpha$ -SMA, and vimentin expression.** HPTCs senescence induced by high glucose. (A) Blue precipitation in cytoplasm was observed in HPTCs (100 magnification). (B) Quantitative analysis of SA-  $\beta$ -gal staining positive area from 6 random fields. \*\*  $p < 0.01$ . (C, D) Cells of each group were immunostained with anti- $\alpha$ -SMA and anti- E-cadherin at 0h, 48h, 72h after high glucose treatment (magnification,  $\times 200$ ). (E, G) Expression of the markers of senescence and EMT in HPTCs cultured in high glucose at 0h, 6h, 12h, 24h, 48h, 72h were quantified by Western blot (n=4). (F, H) Quantitative analysis of band density for the markers. The protein expression data are presented as mean $\pm$ SD. \*  $p < 0.05$ ; \*\*  $p < 0.01$ .

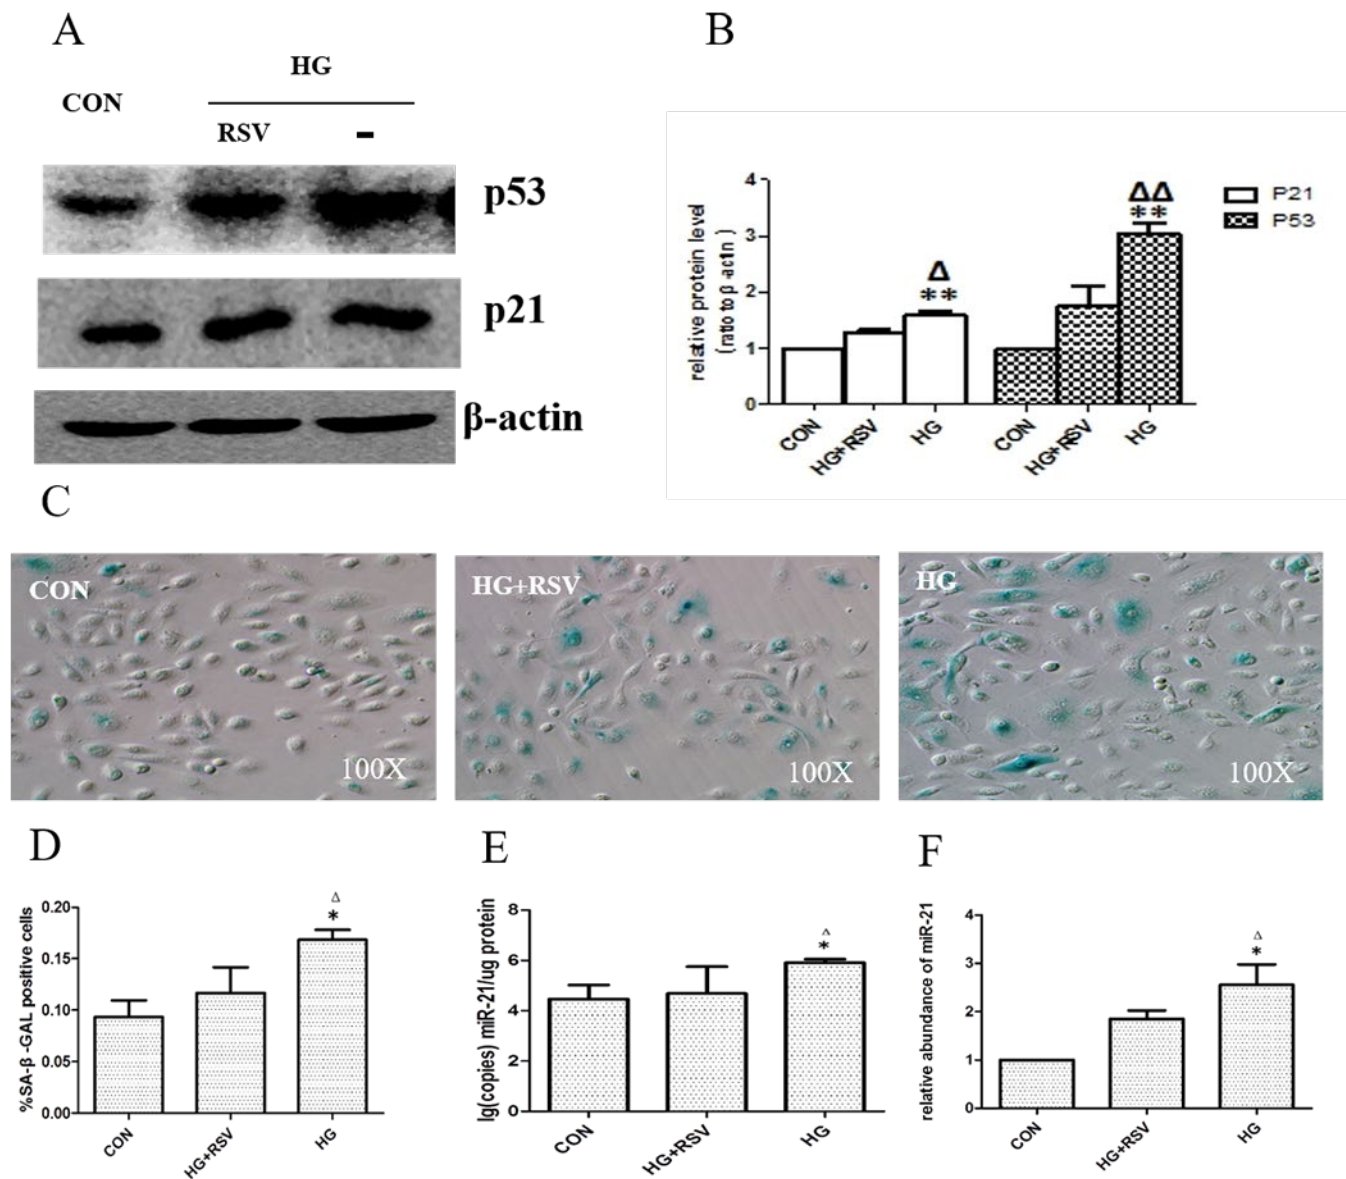

**Supplementary Figure 3. The effects of high glucose and resveratrol on senescence phenotype and miR-21 expression.** (A) The expressions of p21 and p53 protein were detected by Western blot analysis. (B) The ratios of p21 and p53 bands were analyzed. (C) SA-β-gal staining in HPTCs cultured by CON, HG, HG+RSV. Blue precipitation in cytoplasm was observed in the senescent cells (100 magnification). (D) Quantitative analysis of SA-β-gal staining positive area from 6 random fields. (E) Expression levels of EVs miR-21 in the three groups detected by qRT-PCR. (F) Expression levels of miR-21 in the three groups detected by qRT-PCR. \*  $p < 0.05$  (HG vs CON);  $\Delta p < 0.05$  (HG vs HG+RSV).
